# Supplementary material
Source: PubMed Central journal article supplement (PMC1393249)
Supplement: mmbr_70_1_12__1.pdf [file mmbr_70_1_12__1.pdf]

**SUPPLEMENTARY TABLE**

| Reference                                                | Name*              | Organism                 | Subunit     | Mutation                 | Equivalent on S.C. RNAPII alignment | Equivalent on T.Aq. alignment | Domain Location | Location near | Homology Region | Affected function <sup>o</sup>                                      |
|----------------------------------------------------------|--------------------|--------------------------|-------------|--------------------------|-------------------------------------|-------------------------------|-----------------|---------------|-----------------|---------------------------------------------------------------------|
| Sugaya et al.(2001), Ref. 169                            | tsTM4              | CHO cells, RNA Pol II    | Rpb1        | P1006S                   | I983S                               | L1168S                        | Foot            | -             | -               | -                                                                   |
| Chen et al.(1993), Ref. 37                               | JH1(C4)            | Drosophila, RNA Pol II   | Rpl1215     | R741H, A657T             | R726H, C642T                        | T1000H, T927I                 | Fore1, Funnel   | -             | -               | -                                                                   |
| Chen et al.(1993), Ref. 37                               | WJK2               | Drosophila, RNA Pol II   | Rpl1215     | L820F                    | L805F                               | R1062F                        | Funnel          | -             | F               | -                                                                   |
| Chen et al.(1993), Ref. 37                               | C20(C4)            | Drosophila, RNA Pol II   | Rpl1215     | L878F                    | V863F                               | V1120F                        | Cleft           | -             | F               | Amanitin resistance (from C4 mutation)                              |
| Chen et al.(1993), Ref. 37                               | Ubl                | Drosophila, RNA Pol II   | Rpl1215     | D866N                    | D671N                               | -                             | Cleft           | -             | F               | -                                                                   |
| Chen et al.(1993), Ref. 37                               | JG1(Ubl)           | Drosophila, RNA Pol II   | Rpl1215     | D866N, L1383Q            | D671N, S1361Q                       | -, Q1393Q                     | Cleft           | -             | F               | -                                                                   |
| Chen et al.(1993), Ref. 37<br>Kim et al.(1994), Ref. 88  | E28(EMS of C4); 12 | Drosophila, RNA Pol II   | Rpl1215     | A377T                    | A371T                               | A649T                         | Active site     | -             | C               | Amanitin resistance (from C4 mutation)                              |
| Chen et al.(1993), Ref. 37;<br>Kim et al.(1994), Ref. 88 | WJK1; K1           | Drosophila, RNA Pol II   | Rpl1215     | S678N                    | S663N                               | T948N                         | Fore1           | -             | -               | Low polymerization, Assembly ou synthesis defect (Rpl1215 K1)       |
| Krasnoselskaya et al.(1998), Ref. 91                     | Rpl1215 ts + R3    | Drosophila, RNA Pol II   | Rpl1215     | R977Y                    | R962Y                               | -                             | Foot            | -             | -               | Suppressor of Rpl1215ts thermosensitive phenotype                   |
| Krasnoselskaya et al.(1998), Ref. 91                     | Rpl1215 ts + R1/R4 | Drosophila, RNA Pol II   | Rpl1215     | G1324S                   | P1302S                              | E1320S                        | Cleft           | -             | -               | Suppressor of Rpl1215ts thermosensitive phenotype                   |
| Krasnoselskaya et al.(1998), Ref. 91                     | Rpl1215 K1 + R4    | Drosophila, RNA Pol II   | Rpl1215     | H713L                    | Q698L                               | E979L                         | Funnel          | -             | -               | Suppressor of Rpl1215 K1 thermosensitive phenotype                  |
| Krasnoselskaya et al.(1998), Ref. 91                     | Rpl1215 K1 + R9    | Drosophila, RNA Pol II   | Rpl1215     | G834V                    | G819V                               | G1076V                        | Cleft           | Bridge Helix  | F               | Suppressor of Rpl1215 K1 thermosensitive phenotype                  |
| Krasnoselskaya et al.(1998), Ref. 91                     | Rpl1215 K1 + R10   | Drosophila, RNA Pol II   | Rpl1215     | S747L                    | L732L                               | A1006L                        | Funnel          | -             | -               | Suppressor of Rpl1215 K1 thermosensitive phenotype                  |
| Krasnoselskaya et al.(1998), Ref. 91                     | Rpl1215 ts         | Drosophila, RNA Pol II   | Rpl1215     | R977C                    | R962C                               | -                             | Foot            | -             | -               | -                                                                   |
| Chen et al.(1993), Ref. 37                               | Z43                | Drosophila, RNA Pol II   | Rpl1140     | R940H                    | R963H                               | R842H                         | Hybrid Binding  | -             | H               | -                                                                   |
| Chen et al.(1993), Ref. 37                               | M39                | Drosophila, RNA Pol II   | Rpl1140     | G992E                    | A1035E                              | G894E                         | Hybrid Binding  | -             | -               | -                                                                   |
| Chen et al.(1993), Ref. 37                               | Z19                | Drosophila, RNA Pol II   | Rpl1140     | E1028K                   | E1070K                              | V972K                         | Hybrid Binding  | -             | I               | -                                                                   |
| Chen et al.(1993), Ref. 37                               | A5                 | Drosophila, RNA Pol II   | Rpl1140     | Δ1047-1051               | Δ1089-1093                          | Δ991-995                      | Hybrid Binding  | -             | I               | -                                                                   |
| Chen et al.(1993), Ref. 37                               | Z45                | Drosophila, RNA Pol II   | Rpl1140     | S1098F                   | A1140F                              | A1042F                        | Anchor          | -             | I               | -                                                                   |
| Kim et al.(1994), Ref. 88                                | -                  | Drosophila, RNA Pol II   | Rpl1140     | S728C                    | S771C                               | D638C                         | Hybrid Binding  | -             | -               | Suppressor of thermosensitive phenotype of Rpl1215K1(S686N?? S678N) |
| Kim et al.(1994), Ref. 88                                | -                  | Drosophila, RNA Pol II   | Rpl1140     | M735I                    | M778I                               | V645I                         | Hybrid Binding  | -             | -               | Suppressor of thermosensitive phenotype of Rpl1215-12(A377T) & K1   |
| Kim et al.(1994), Ref. 88                                | -                  | Drosophila, RNA Pol II   | Rpl1140     | M735V                    | M778V                               | V645V                         | Hybrid Binding  | -             | -               | Suppressor of thermosensitive phenotype of Rpl1215-12(A377T) & K1   |
| De la Mata et al.(2003), Ref. 45                         | C4                 | Human, RNA Pol II        | Rpb1        | R749H                    | R726H                               | T1000H                        | Funnel          | -             | -               | Altered alternative splicing favors upstream 5' splicing sites      |
| Jeronimo et al.(2004), Ref. 80                           | Fork1-11           | Human, RNA Pol II        | Rpb2        | Δ458-459                 | Δ471-472                            | -                             | Fork            | Fork1         | -               | -                                                                   |
| Jeronimo et al.(2004), Ref. 80                           | sw3-1122           | Human, RNA Pol II        | Rpb2        | R1078A, S1079A, R1080A   | R1122A, S1123A, R1124A              | K1024A, A1025A, Q1026A        | Hybrid Binding  | Switch3       | I               | -                                                                   |
| Langelier et al.(2005), Ref. 99                          | MB                 | Human, RNA Pol II        | Rpb2        | E791A, D792A             | E836A, D837A                        | E685A, D686A                  | Hybrid Binding  | -             | F               | Assembly defect                                                     |
| Werner et al.(2002), Ref. 191                            | -                  | M.Jannaschii             | Beta prime  | D466A                    | D481A                               | D739A                         | Active site     | -             | D               | Catalytically dead                                                  |
| Werner et al.(2002), Ref. 191                            | -                  | M.Jannaschii             | Beta prime  | D468A                    | D483A                               | D741A                         | Active site     | -             | D               | Catalytically dead                                                  |
| Werner et al.(2002), Ref. 191                            | -                  | M.Jannaschii             | Beta prime  | D470A                    | D485A                               | D743A                         | Active site     | -             | D               | Catalytically dead                                                  |
| Werner et al.(2002), Ref. 191                            | -                  | M.Jannaschii             | Beta        | E224A D225A              | E836A, D837A                        | E685A, D686A                  | Hybrid Binding  | -             | F               | Catalytically dead                                                  |
| Onai et al.(1998), Ref. 127                              | un-18+             | N. Crassa, RNA Pol I     | 2nd largest | G976D                    | A1024D                              | G883D                         | Hybrid Binding  | -             | H               | -                                                                   |
| Wittekind et al.(1988), Ref. 197                         | rpa190-2           | S.Cerevisiae, RNA Pol I  | Rpa190      | W679STOP                 | K533STOP                            | Y791STOP                      | Fore1           | -             | -               | -                                                                   |
| Wittekind et al.(1988), Ref. 197                         | rpa190-3           | S.Cerevisiae, RNA Pol I  | Rpa190      | G728D                    | G574D                               | G837D                         | Fore1           | -             | E               | -                                                                   |
| Allison et al.(1989), Ref. 2                             | rpo21-Δ88          | S.Cerevisiae, RNA Pol II | Rpb1        | CTD deletion repeat 5-17 | CTD deletion repeat 5-17            | -                             | -               | -             | -               | -                                                                   |
| Allison et al.(1989), Ref. 2                             | rpo21-yt           | S.Cerevisiae, RNA Pol II | Rpb1        | Add 12 repeat before CTD | Add 12 repeat before CTD            | -                             | -               | -             | -               | -                                                                   |
| Archambault et al.(1992), Ref. 5                         | rpo21-17           | S.Cerevisiae, RNA Pol II | Rpb1        | V1107(ARAR)A             | V1107(ARAR)A                        | A1265(ARAR)A                  | Cleft           | Trigger Loop  | -               | 6-AU sensitivity suppressed by high dosage ppr2                     |
| Berroteeran et al.(1994), Ref. 20                        | sua8-4             | S.Cerevisiae, RNA Pol II | Rpb1        | G1388V                   | G1388V                              | A1428V                        | Cleft           | Switch1       | -               | Low polymerization, ty insertion supressor, start site selection    |
| Donaldson et al.(2000), Ref. 49                          | rpo21-27           | S.Cerevisiae, RNA Pol II | Rpb1        | C67S                     | C67S                                | C73S                          | Clamp core      | -             | A               | -                                                                   |
| Donaldson et al.(2000), Ref. 49                          | rpo21-36           | S.Cerevisiae, RNA Pol II | Rpb1        | C67S, C70S               | C67S, C70S                          | C73S, C76S                    | Clamp core      | -             | A               | -                                                                   |
| Donaldson et al.(2000), Ref. 49                          | rpo21-28           | S.Cerevisiae, RNA Pol II | Rpb1        | C70S                     | C70S                                | C76S                          | Clamp core      | -             | A               | -                                                                   |

|                                                                    |                  |                          |      |                            |                            |                            |                         |          |   |                                                   |
|--------------------------------------------------------------------|------------------|--------------------------|------|----------------------------|----------------------------|----------------------------|-------------------------|----------|---|---------------------------------------------------|
| Donaldson et al.(2000), Ref. 49                                    | rpo21-29         | S.Cerevisiae, RNA Pol II | Rpb1 | C77S                       | C77S                       | S83S                       | Clamp core              | -        | A | -                                                 |
| Donaldson et al.(2000), Ref. 49                                    | rpo21-37         | S.Cerevisiae, RNA Pol II | Rpb1 | C77S, H80Y, H83Y           | C77S, H80Y, H83Y           | S83S, R89Y, H82Y           | Clamp core              | -        | A | -                                                 |
| Donaldson et al.(2000), Ref. 49                                    | rpo21-30         | S.Cerevisiae, RNA Pol II | Rpb1 | H80Y                       | H80Y                       | R89Y                       | Clamp core              | -        | A | -                                                 |
| Donaldson et al.(2000), Ref. 49                                    | rpo21-31         | S.Cerevisiae, RNA Pol II | Rpb1 | H83Y                       | H83Y                       | H92Y                       | Clamp core              | -        | A | -                                                 |
| Donaldson et al.(2000), Ref. 49                                    | rpo21-32         | S.Cerevisiae, RNA Pol II | Rpb1 | C103S                      | C103S                      | L123S                      | Clamp Head              | -        | A | -                                                 |
| Donaldson et al.(2000), Ref. 49                                    | rpo21-39         | S.Cerevisiae, RNA Pol II | Rpb1 | C103S, C105S, C107S, C110S | C103S, C105S, C107S, C110S | L123S, Q125S, L127S, N130S | Clamp Head              | -        | A | -                                                 |
| Donaldson et al.(2000), Ref. 49                                    | rpo21-33         | S.Cerevisiae, RNA Pol II | Rpb1 | C105S                      | C105S                      | Q125S                      | Clamp Head              | -        | A | -                                                 |
| Donaldson et al.(2000), Ref. 49                                    | rpo21-38         | S.Cerevisiae, RNA Pol II | Rpb1 | C105S, C107S, C110S        | C105S, C107S, C110S        | Q125S, L127S, N130S        | Clamp Head              | -        | A | -                                                 |
| Donaldson et al.(2000), Ref. 49                                    | rpo21-34         | S.Cerevisiae, RNA Pol II | Rpb1 | C107S                      | C107S                      | L127S                      | Clamp Head              | -        | - | -                                                 |
| Donaldson et al.(2000), Ref. 49                                    | rpo21-35         | S.Cerevisiae, RNA Pol II | Rpb1 | C110S                      | C110S                      | N130S                      | Clamp Head              | -        | - | -                                                 |
| Drebot et al.(1993), Ref. 51                                       | rpo21-4          | S.Cerevisiae, RNA Pol II | Rpb1 | W954(LELE)P                | W954(LELE)P                | -                          | Foot                    | -        | - | Assembly                                          |
| Himmelfarb et al.(1987), Ref. 67                                   | rpo21-3          | S.Cerevisiae, RNA Pol II | Rpb1 | G111D                      | G111D                      | K131D                      | Clamp Head              | -        | - | -                                                 |
| Himmelfarb et al.(1987), Ref. 67;<br>Werner et al.(1992), Ref. 192 | rpo21-1          | S.Cerevisiae, RNA Pol II | Rpb1 | G79D                       | G79D                       | Y88D                       | Clamp core              | -        | A | -                                                 |
| Himmelfarb et al.(1987), Ref. 67;<br>Werner et al.(1992), Ref. 192 | rpo21-2          | S.Cerevisiae, RNA Pol II | Rpb1 | G111D, E360K               | G111D, E360K               | K131D, K638K               | Clamp Head, Active site | -        | - | -                                                 |
| Majovski et al.(2005), Ref. 110                                    | -                | S.Cerevisiae, RNA Pol II | Rpb1 | N339A                      | N339A                      | N617A                      | Clamp Core              | Switch 2 | C | -                                                 |
| Majovski et al.(2005), Ref. 110                                    | -                | S.Cerevisiae, RNA Pol II | Rpb1 | D346A                      | D346A                      | D624A                      | Active site             | Switch 2 | C | -                                                 |
| Majovski et al.(2005), Ref. 110                                    | -                | S.Cerevisiae, RNA Pol II | Rpb1 | V352A                      | V352A                      | V630A                      | Active site             | Switch 2 | C | -                                                 |
| Majovski et al.(2005), Ref. 110                                    | -                | S.Cerevisiae, RNA Pol II | Rpb1 | P357A                      | P357A                      | P635A                      | Active site             | -        | C | -                                                 |
| Majovski et al.(2005), Ref. 110                                    | -                | S.Cerevisiae, RNA Pol II | Rpb1 | L359A                      | L359A                      | L637A                      | Active site             | -        | C | -                                                 |
| Majovski et al.(2005), Ref. 110                                    | -                | S.Cerevisiae, RNA Pol II | Rpb1 | Q363A                      | Q363A                      | Q641A                      | Active site             | -        | C | -                                                 |
| Majovski et al.(2005), Ref. 110                                    | -                | S.Cerevisiae, RNA Pol II | Rpb1 | D408A                      | D408A                      | Q680A                      | Dock                    | -        | - | -                                                 |
| Majovski et al.(2005), Ref. 110                                    | -                | S.Cerevisiae, RNA Pol II | Rpb1 | G410A                      | G410A                      | D682A                      | Dock                    | -        | - | -                                                 |
| Majovski et al.(2005), Ref. 110                                    | -                | S.Cerevisiae, RNA Pol II | Rpb1 | D411A                      | D411A                      | I683A                      | Dock                    | -        | - | -                                                 |
| Majovski et al.(2005), Ref. 110                                    | -                | S.Cerevisiae, RNA Pol II | Rpb1 | D411K                      | D411K                      | I683K                      | Dock                    | -        | - | -                                                 |
| Majovski et al.(2005), Ref. 110                                    | -                | S.Cerevisiae, RNA Pol II | Rpb1 | R412A                      | R412A                      | K684A                      | Dock                    | -        | - | -                                                 |
| Majovski et al.(2005), Ref. 110                                    | -                | S.Cerevisiae, RNA Pol II | Rpb1 | I413A                      | I413A                      | D685A                      | Dock                    | -        | - | -                                                 |
| Majovski et al.(2005), Ref. 110                                    | -                | S.Cerevisiae, RNA Pol II | Rpb1 | D414A                      | D414A                      | E686A                      | Dock                    | -        | - | -                                                 |
| Majovski et al.(2005), Ref. 110                                    | -                | S.Cerevisiae, RNA Pol II | Rpb1 | D414K                      | D414K                      | E686K                      | Dock                    | -        | - | -                                                 |
| Majovski et al.(2005), Ref. 110                                    | -                | S.Cerevisiae, RNA Pol II | Rpb1 | L415A                      | L415A                      | V687A                      | Dock                    | -        | - | -                                                 |
| Majovski et al.(2005), Ref. 110                                    | -                | S.Cerevisiae, RNA Pol II | Rpb1 | R416A                      | R416A                      | -                          | Dock                    | -        | - | -                                                 |
| Majovski et al.(2005), Ref. 110                                    | -                | S.Cerevisiae, RNA Pol II | Rpb1 | Y417A                      | Y417A                      | -                          | Dock                    | -        | - | -                                                 |
| Majovski et al.(2005), Ref. 110                                    | -                | S.Cerevisiae, RNA Pol II | Rpb1 | S418A                      | S418A                      | -                          | Dock                    | -        | - | -                                                 |
| Majovski et al.(2005), Ref. 110                                    | -                | S.Cerevisiae, RNA Pol II | Rpb1 | K419A                      | K419A                      | -                          | Dock                    | -        | - | -                                                 |
| Majovski et al.(2005), Ref. 110                                    | -                | S.Cerevisiae, RNA Pol II | Rpb1 | R420E                      | R420E                      | -                          | Dock                    | -        | - | -                                                 |
| Majovski et al.(2005), Ref. 110                                    | -                | S.Cerevisiae, RNA Pol II | Rpb1 | L443A                      | L443A                      | L701A                      | Active site             | -        | D | -                                                 |
| Majovski et al.(2005), Ref. 110                                    | -                | S.Cerevisiae, RNA Pol II | Rpb1 | R446A                      | R446A                      | R704A                      | Active site             | -        | D | -                                                 |
| Majovski et al.(2005), Ref. 110                                    | -                | S.Cerevisiae, RNA Pol II | Rpb1 | V474A                      | V474A                      | V732A                      | Active site             | -        | D | -                                                 |
| Majovski et al.(2005), Ref. 110                                    | -                | S.Cerevisiae, RNA Pol II | Rpb1 | Y478A                      | Y478A                      | F736A                      | Active site             | -        | D | -                                                 |
| Majovski et al.(2005), Ref. 110                                    | -                | S.Cerevisiae, RNA Pol II | Rpb1 | M487A                      | M487A                      | M745A                      | Active site             | -        | D | -                                                 |
| Majovski et al.(2005), Ref. 110                                    | -                | S.Cerevisiae, RNA Pol II | Rpb1 | P492A                      | P492A                      | P750A                      | Active site             | -        | D | -                                                 |
| Majovski et al.(2005), Ref. 110                                    | -                | S.Cerevisiae, RNA Pol II | Rpb1 | L504A                      | L504A                      | Q762A                      | Active site             | -        | - | -                                                 |
| Martin et al.(1990), Ref. 111                                      | rpb1-511/512     | S.Cerevisiae, RNA Pol II | Rpb1 | R326C                      | R326C                      | T604C                      | Clamp core              | Switch2  | - | Suppressor of thermosensitive phenotype of rpb2-2 |
| Martin et al.(1990), Ref. 111                                      | rpb1-510, E1061A | S.Cerevisiae, RNA Pol II | Rpb1 | E1062A                     | E1062A                     | E1219A                     | Cleft                   | -        | G | Suppressor of thermosensitive phenotype of rpb2-2 |

|                               |                 |                          |      |                                           |                                           |               |                         |         |   |                                                   |
|-------------------------------|-----------------|--------------------------|------|-------------------------------------------|-------------------------------------------|---------------|-------------------------|---------|---|---------------------------------------------------|
| Martin et al.(1990), Ref. 111 | rpb1-513        | S.Cerevisiae, RNA Pol II | Rpb1 | F1410L                                    | F1410L                                    | T1448L        | Clamp core              | Switch1 | H | Suppressor of thermosensitive phenotype of rpb2-2 |
| Martin et al.(1990), Ref. 111 | rpb1-514        | S.Cerevisiae, RNA Pol II | Rpb1 | S1449L                                    | S1449L                                    | V1487L        | Linker                  | -       | - | Suppressor of thermosensitive phenotype of rpb2-2 |
| Nonet et al.(1989), Ref. 124  | rpb1-551        | S.Cerevisiae, RNA Pol II | Rpb1 | V1428F                                    | V1428F                                    | V1466F        | Clamp core              | -       | H | Suppressor of CTD deletions                       |
| Scafe et al.(1990), Ref. 150  | rpb1-9          | S.Cerevisiae, RNA Pol II | Rpb1 | P24S                                      | P24S                                      | P15S          | Clamp core              | -       | - | -                                                 |
| Scafe et al.(1990), Ref. 150  | rpb1-18         | S.Cerevisiae, RNA Pol II | Rpb1 | G166S                                     | G166S                                     | G457S         | Clamp Head              | -       | - | -                                                 |
| Scafe et al.(1990), Ref. 150  | rpb1-13         | S.Cerevisiae, RNA Pol II | Rpb1 | P172S                                     | P172S                                     | E463S         | Clamp Head              | -       | - | -                                                 |
| Scafe et al.(1990), Ref. 150  | rpb1-5          | S.Cerevisiae, RNA Pol II | Rpb1 | R335C                                     | R335C                                     | R613C         | Clamp core              | Switch2 | C | -                                                 |
| Scafe et al.(1990), Ref. 150  | rpb1-14         | S.Cerevisiae, RNA Pol II | Rpb1 | R412H                                     | R412H                                     | K684H         | Dock                    | -       | - | -                                                 |
| Scafe et al.(1990), Ref. 150  | rpb1-17         | S.Cerevisiae, RNA Pol II | Rpb1 | M487I                                     | M487I                                     | M745I         | Active site             | -       | D | -                                                 |
| Scafe et al.(1990), Ref. 150  | rpb1-10         | S.Cerevisiae, RNA Pol II | Rpb1 | G558D, M818I                              | G558D, M818I                              | A814D, H1075I | Pore1, Cleft            | -       | - | -                                                 |
| Scafe et al.(1990), Ref. 150  | rpb1-19         | S.Cerevisiae, RNA Pol II | Rpb1 | C1240Y                                    | C1240Y                                    | -             | Jaw                     | -       | - | -                                                 |
| Scafe et al.(1990), Ref. 150  | rpb1-15         | S.Cerevisiae, RNA Pol II | Rpb1 | I1327N                                    | I1327N                                    | Y1347N        | Cleft                   | -       | - | -                                                 |
| Scafe et al.(1990), Ref. 150  | rpb1-1          | S.Cerevisiae, RNA Pol II | Rpb1 | G1437D                                    | G1437D                                    | G1475D        | Linker                  | Switch5 | H | -                                                 |
| Werner et al.(1992), Ref. 192 | rpo21-2         | S.Cerevisiae, RNA Pol II | Rpb1 | G111D, E360K                              | G111D, E360K                              | K131D, K638K  | Clamp Head, Active site | -       | - | -                                                 |
| West et al.(1995), Ref. 193   | WT(7)           | S.Cerevisiae, RNA Pol II | Rpb1 | 7 repeat                                  | 7 repeat                                  | -             | -                       | -       | - | -                                                 |
| West et al.(1995), Ref. 193   | WT(8)           | S.Cerevisiae, RNA Pol II | Rpb1 | 8 repeat                                  | 8 repeat                                  | -             | -                       | -       | - | -                                                 |
| West et al.(1995), Ref. 193   | WT(9)           | S.Cerevisiae, RNA Pol II | Rpb1 | 9 repeat                                  | 9 repeat                                  | -             | -                       | -       | - | -                                                 |
| West et al.(1995), Ref. 193   | WT(10)          | S.Cerevisiae, RNA Pol II | Rpb1 | 10 repeat                                 | 10 repeat                                 | -             | -                       | -       | - | -                                                 |
| West et al.(1995), Ref. 193   | WT(11)          | S.Cerevisiae, RNA Pol II | Rpb1 | 11 repeat                                 | 11 repeat                                 | -             | -                       | -       | - | -                                                 |
| West et al.(1995), Ref. 193   | WT(12)          | S.Cerevisiae, RNA Pol II | Rpb1 | 12 repeat                                 | 12 repeat                                 | -             | -                       | -       | - | -                                                 |
| West et al.(1995), Ref. 193   | WT(13)          | S.Cerevisiae, RNA Pol II | Rpb1 | 13 repeat                                 | 13 repeat                                 | -             | -                       | -       | - | -                                                 |
| West et al.(1995), Ref. 193   | WT(14)          | S.Cerevisiae, RNA Pol II | Rpb1 | 14 repeat                                 | 14 repeat                                 | -             | -                       | -       | - | -                                                 |
| West et al.(1995), Ref. 193   | A2              | S.Cerevisiae, RNA Pol II | Rpb1 | (14-18 repeat) S2A                        | (14-18 repeat) S2A                        | -             | -                       | -       | - | -                                                 |
| West et al.(1995), Ref. 193   | A5              | S.Cerevisiae, RNA Pol II | Rpb1 | 15 repeat S5A                             | 15 repeat S5A                             | -             | -                       | -       | - | -                                                 |
| West et al.(1995), Ref. 193   | A2,5            | S.Cerevisiae, RNA Pol II | Rpb1 | 10 repeat S2A S5A                         | 10 repeat S2A S5A                         | -             | -                       | -       | - | -                                                 |
| West et al.(1995), Ref. 193   | E2              | S.Cerevisiae, RNA Pol II | Rpb1 | 10-15 repeat S2E                          | 10-15 repeat S2E                          | -             | -                       | -       | - | -                                                 |
| West et al.(1995), Ref. 193   | E5              | S.Cerevisiae, RNA Pol II | Rpb1 | 10-12-18 repeat S5E                       | 10-12-18 repeat S5E                       | -             | -                       | -       | - | -                                                 |
| West et al.(1995), Ref. 193   | P2S3            | S.Cerevisiae, RNA Pol II | Rpb1 | 10-15 repeat S2P, P3S                     | 10-15 repeat S2P, P3S                     | -             | -                       | -       | - | -                                                 |
| West et al.(1995), Ref. 193   | F1              | S.Cerevisiae, RNA Pol II | Rpb1 | 12 repeat Y1F                             | 12 repeat Y1F                             | -             | -                       | -       | - | -                                                 |
| West et al.(1995), Ref. 193   | A2(4)WT(7)      | S.Cerevisiae, RNA Pol II | Rpb1 | 4 repeats S2A, 7 repeat WT                | 4 repeats S2A, 7 repeat WT                | -             | -                       | -       | - | -                                                 |
| West et al.(1995), Ref. 193   | A2(3)WT(8)      | S.Cerevisiae, RNA Pol II | Rpb1 | 3 repeats S2A, 8 repeat WT                | 3 repeats S2A, 8 repeat WT                | -             | -                       | -       | - | -                                                 |
| West et al.(1995), Ref. 193   | A2(8)WT(7)      | S.Cerevisiae, RNA Pol II | Rpb1 | 8 repeats S2A, 7 repeats WT               | 8 repeats S2A, 7 repeats WT               | -             | -                       | -       | - | -                                                 |
| West et al.(1995), Ref. 193   | E2(4)A2(4)WT(7) | S.Cerevisiae, RNA Pol II | Rpb1 | 4 repeats S2E, 4 repeats S2A, 7 repeat WT | 4 repeats S2E, 4 repeats S2A, 7 repeat WT | -             | -                       | -       | - | -                                                 |
| West et al.(1995), Ref. 193   | WT(9)A2(6)      | S.Cerevisiae, RNA Pol II | Rpb1 | 9 repeats WT, 6 repeats S2A               | 9 repeats WT, 6 repeats S2A               | -             | -                       | -       | - | -                                                 |
| West et al.(1995), Ref. 193   | A5(5)WT(7)      | S.Cerevisiae, RNA Pol II | Rpb1 | 5 repeats S5A, 7 repeats WT               | 5 repeats S5A, 7 repeats WT               | -             | -                       | -       | - | -                                                 |
| West et al.(1995), Ref. 193   | WT(7)A5(7)      | S.Cerevisiae, RNA Pol II | Rpb1 | 7 repeats WT, 7 repeats S5A               | 7 repeats WT, 7 repeats S5A               | -             | -                       | -       | - | -                                                 |
| West et al.(1995), Ref. 193   | A2,5(8)WT(7)    | S.Cerevisiae, RNA Pol II | Rpb1 | 8 repeats S2A S5A, 7 repeats WT           | 8 repeats S2A S5A, 7 repeats WT           | -             | -                       | -       | - | -                                                 |
| West et al.(1995), Ref. 193   | WT(10)A2,5(7)   | S.Cerevisiae, RNA Pol II | Rpb1 | 10 repeats WT, 7 repeats S2A S5A          | 10 repeats WT, 7 repeats S2A S5A          | -             | -                       | -       | - | -                                                 |
| West et al.(1995), Ref. 193   | WT(7)A2,5 (7)   | S.Cerevisiae, RNA Pol II | Rpb1 | 7 repeats WT, 7 repeats S2A S5A           | 7 repeats WT, 7 repeats S2A S5A           | -             | -                       | -       | - | -                                                 |
| West et al.(1995), Ref. 193   | WT(6)E2(7)      | S.Cerevisiae, RNA Pol II | Rpb1 | 6 repeats WT, 7 repeats S2E               | 6 repeats WT, 7 repeats S2E               | -             | -                       | -       | - | -                                                 |
| West et al.(1995), Ref. 193   | E2(5)WT(7)      | S.Cerevisiae, RNA Pol II | Rpb1 | 5 repeats S2E, 7 repeats WT               | 5 repeats S2E, 7 repeats WT               | -             | -                       | -       | - | -                                                 |
| West et al.(1995), Ref. 193   | WT(6)E5(7)      | S.Cerevisiae, RNA Pol II | Rpb1 | 6 repeats WT, 7 repeats S5E               | 6 repeats WT, 7 repeats S5E               | -             | -                       | -       | - | -                                                 |
| West et al.(1995), Ref. 193   | E5(5)WT(7)      | S.Cerevisiae, RNA Pol II | Rpb1 | 5 repeats S5E, 7 repeats WT               | 5 repeats S5E, 7 repeats WT               | -             | -                       | -       | - | -                                                 |

|                                                                |                      |                           |        |                          |                          |                        |                |         |   |   |                                                            |
|----------------------------------------------------------------|----------------------|---------------------------|--------|--------------------------|--------------------------|------------------------|----------------|---------|---|---|------------------------------------------------------------|
| West et al.(1995), Ref. 193                                    | (12)E2/W1m           | S.Cerevisiae, RNA Pol II  | Rpb1   | 12 repeats random S2E/WT | 12 repeats random S2E/WT | -                      | -              | -       | - | - | -                                                          |
| Hekmatpanah et al.(1991), Ref. 65                              | rpb2-502, S486L      | S.Cerevisiae, RNA Pol II  | Rpb2   | S489L                    | S489L                    | L401L                  | Fork           | -       | - | - | Ty insertion suppressor, start site selection              |
| Martin et al.(1990), Ref. 111                                  | rpb2-513/514         | S.Cerevisiae, RNA Pol II  | Rpb2   | D1125N                   | D1125N                   | F1027N                 | Hybrid Binding | Switch3 | I | - | Suppressor of thermosensitive phenotype of rpb1-1 & rpb1-5 |
| Martin et al.(1990), Ref. 111                                  | rpb2-510/511/516/517 | S.Cerevisiae, RNA Pol II  | Rpb2   | S1145L                   | S1145L                   | H1047L                 | Anchor         | Switch4 | I | - | Suppressor of thermosensitive rpb1-1                       |
| Powell et al.(1996), Ref. 136;<br>Scafe et al.(1990), Ref. 150 | rpb2-7               | S.Cerevisiae, RNA Pol II  | Rpb2   | R120C                    | R120C                    | K86C                   | Protrusion     | -       | A | - | Low polymerization, 6-Azauracil sensitivity                |
| Scafe et al.(1990), Ref. 150                                   | rpb2-11, C828Y       | S.Cerevisiae, RNA Pol II  | Rpb2   | C829Y                    | C829Y                    | P678Y                  | Hybrid Binding | -       | F | - | -                                                          |
| Scafe et al.(1990), Ref. 150                                   | rpb2-6               | S.Cerevisiae, RNA Pol II  | Rpb2   | R857K                    | R857K                    | E706K                  | Wall           | -       | - | - | -                                                          |
| Scafe et al.(1990), Ref. 150                                   | rpb2-9               | S.Cerevisiae, RNA Pol II  | Rpb2   | G913D                    | G913D                    | G757D                  | Wall           | -       | G | - | -                                                          |
| Scafe et al.(1990), Ref. 150                                   | rpb2-4               | S.Cerevisiae, RNA Pol II  | Rpb2   | A1016T                   | A1016T                   | G875T                  | Hybrid Binding | -       | H | - | -                                                          |
| Scafe et al.(1990), Ref. 150                                   | rpb2-5               | S.Cerevisiae, RNA Pol II  | Rpb2   | G1068E                   | G1068E                   | G970E                  | Hybrid Binding | -       | I | - | -                                                          |
| Scafe et al.(1990), Ref. 150                                   | rpb2-3               | S.Cerevisiae, RNA Pol II  | Rpb2   | R1106K                   | R1106K                   | R1008K                 | Hybrid Binding | Switch3 | I | - | -                                                          |
| Scafe et al.(1990), Ref. 150                                   | rpb2-1; rpb2-2       | S.Cerevisiae, RNA Pol II  | Rpb2   | G1142D                   | G1142D                   | G1044D                 | Anchor         | -       | I | - | -                                                          |
| Scafe et al.(1990), Ref. 150                                   | rpb2-8               | S.Cerevisiae, RNA Pol II  | Rpb2   | C1182Y                   | C1182Y                   | I1071Y                 | Clamp          | -       | - | - | -                                                          |
| Scafe et al.(1990), Ref. 151                                   | rpb2-2               | S.Cerevisiae, RNA Pol II  | Rpb2   | G1142D                   | G1142D                   | G1044D                 | Anchor         | -       | I | - | -                                                          |
| Treich et al.(1991), Ref. 181                                  | -                    | S.Cerevisiae, RNA Pol II  | Rpb2   | C1163A                   | C1163A                   | -                      | Clamp          | -       | - | - | -                                                          |
| Treich et al.(1991), Ref. 181                                  | -                    | S.Cerevisiae, RNA Pol II  | Rpb2   | I1165V, C1166A           | I1165V, C1166A           | I1060V, E1061A         | Clamp          | -       | - | - | -                                                          |
| Treich et al.(1991), Ref. 181                                  | -                    | S.Cerevisiae, RNA Pol II  | Rpb2   | C1166S                   | C1166S                   | E1061S                 | Clamp          | -       | - | - | -                                                          |
| Treich et al.(1991), Ref. 181                                  | -                    | S.Cerevisiae, RNA Pol II  | Rpb2   | G1167F                   | G1167F                   | G1062F                 | Clamp          | -       | - | - | -                                                          |
| Treich et al.(1991), Ref. 181                                  | -                    | S.Cerevisiae, RNA Pol II  | Rpb2   | L1168P                   | L1168P                   | R1063P                 | Clamp          | -       | - | - | -                                                          |
| Treich et al.(1991), Ref. 181                                  | -                    | S.Cerevisiae, RNA Pol II  | Rpb2   | C1182A                   | C1182A                   | I1071A                 | Clamp          | -       | - | - | -                                                          |
| Treich et al.(1991), Ref. 181                                  | -                    | S.Cerevisiae, RNA Pol II  | Rpb2   | C1185A                   | C1185A                   | -                      | Clamp          | -       | - | - | -                                                          |
| Treich et al.(1992), Ref. 180                                  | -                    | S.Cerevisiae, RNA Pol II  | Rpb2   | K962R                    | K962R                    | E821R                  | Wall           | -       | H | - | -                                                          |
| Treich et al.(1992), Ref. 180                                  | -                    | S.Cerevisiae, RNA Pol II  | Rpb2   | K962R, K965R, K972R      | K962R, K965R, K972R      | E821R, R824R, R831R    | Wall           | -       | H | - | -                                                          |
| Treich et al.(1992), Ref. 180                                  | -                    | S.Cerevisiae, RNA Pol II  | Rpb2   | K965R                    | K965R                    | R824R                  | Wall           | -       | H | - | -                                                          |
| Treich et al.(1992), Ref. 180                                  | -                    | S.Cerevisiae, RNA Pol II  | Rpb2   | K972R                    | K972R                    | R831R                  | Wall           | -       | H | - | -                                                          |
| Treich et al.(1992), Ref. 180                                  | -                    | S.Cerevisiae, RNA Pol II  | Rpb2   | K979R                    | K979R                    | K838R                  | Hybrid Binding | -       | H | - | -                                                          |
| Treich et al.(1992), Ref. 180                                  | -                    | S.Cerevisiae, RNA Pol II  | Rpb2   | K987R                    | K987R                    | K846R                  | Hybrid Binding | -       | H | - | -                                                          |
| Treich et al.(1992), Ref. 180                                  | -                    | S.Cerevisiae, RNA Pol II  | Rpb2   | K1102R                   | K1102R                   | K1004R                 | Hybrid Binding | -       | I | - | -                                                          |
| Dieci et al.(1995), Ref. 48                                    | rpc160-108           | S.Cerevisiae, RNA Pol III | RPC160 | T497N                    | T467N                    | S725N                  | Active site    | -       | D | - | -                                                          |
| Dieci et al.(1995), Ref. 48                                    | rpc160-143           | S.Cerevisiae, RNA Pol III | RPC160 | L500I                    | L470I                    | L728I                  | Active site    | -       | D | - | -                                                          |
| Dieci et al.(1995), Ref. 48                                    | rpc160-170           | S.Cerevisiae, RNA Pol III | RPC160 | T506I                    | S476I                    | E734I                  | Active site    | -       | D | - | Intragenic suppressor of N509Y                             |
| Dieci et al.(1995), Ref. 48                                    | rpc160-171           | S.Cerevisiae, RNA Pol III | RPC160 | T506R                    | S476R                    | E734R                  | Active site    | -       | D | - | -                                                          |
| Dieci et al.(1995), Ref. 48                                    | rpc160-212           | S.Cerevisiae, RNA Pol III | RPC160 | T506I, D511Y             | S476I, D481Y             | E734I, D739Y           | Active site    | -       | D | - | -                                                          |
| Dieci et al.(1995), Ref. 48                                    | rpc160-144           | S.Cerevisiae, RNA Pol III | RPC160 | P507H                    | P477H                    | A735H                  | Active site    | -       | D | - | -                                                          |
| Dieci et al.(1995), Ref. 48                                    | rpc160-164           | S.Cerevisiae, RNA Pol III | RPC160 | P507L, Y508I, N509STOP   | P477L, Y478I, N479STOP   | A735L, F736I, N737STOP | Active site    | -       | D | - | -                                                          |
| Dieci et al.(1995), Ref. 48                                    | rpc160-167           | S.Cerevisiae, RNA Pol III | RPC160 | P507T, T524I, N533T      | P477T, S494I, Q503T      | A735T, S752I, I761T    | Active site    | -       | D | - | -                                                          |
| Dieci et al.(1995), Ref. 48                                    | rpc160-198           | S.Cerevisiae, RNA Pol III | RPC160 | Y508S                    | Y478S                    | F736S                  | Active site    | -       | D | - | -                                                          |
| Dieci et al.(1995), Ref. 48                                    | rpc160-197           | S.Cerevisiae, RNA Pol III | RPC160 | Y508F                    | Y478F                    | F736F                  | Active site    | -       | D | - | -                                                          |
| Dieci et al.(1995), Ref. 48                                    | rpc160-146           | S.Cerevisiae, RNA Pol III | RPC160 | N509Y, N533D             | N479Y, Q503D             | N737Y, I761D           | Active site    | -       | D | - | -                                                          |
| Dieci et al.(1995), Ref. 48                                    | rpc160-172           | S.Cerevisiae, RNA Pol III | RPC160 | N509Y                    | N479Y                    | N737Y                  | Active site    | -       | D | - | -                                                          |
| Dieci et al.(1995), Ref. 48                                    | rpc160-173           | S.Cerevisiae, RNA Pol III | RPC160 | N509D                    | N479D                    | N737D                  | Active site    | -       | D | - | -                                                          |
| Dieci et al.(1995), Ref. 48                                    | rpc160-174           | S.Cerevisiae, RNA Pol III | RPC160 | N509H                    | N479H                    | N737H                  | Active site    | -       | D | - | -                                                          |
| Dieci et al.(1995), Ref. 48                                    | rpc160-133           | S.Cerevisiae, RNA Pol III | RPC160 | N509H, M517K, E525V      | N479H, M487K, E495V      | N737H, M745K, S753V    | Active site    | -       | D | - | -                                                          |

|                                                                         |            |                           |        |              |              |              |             |   |   |   |
|-------------------------------------------------------------------------|------------|---------------------------|--------|--------------|--------------|--------------|-------------|---|---|---|
| Dieci et al.(1995), Ref. 48                                             | rpc160-199 | S.Cerevisiae, RNA Pol III | RPC160 | A510G        | A480G        | A738G        | Active site | - | D | - |
| Dieci et al.(1995), Ref. 48                                             | rpc160-216 | S.Cerevisiae, RNA Pol III | RPC160 | A510G, M517R | A480G, M487R | A738G, M745R | Active site | - | D | - |
| Dieci et al.(1995), Ref. 48                                             | rpc160-217 | S.Cerevisiae, RNA Pol III | RPC160 | A510D, M517I | A480D, M487I | A738D, M745I | Active site | - | D | - |
| Dieci et al.(1995), Ref. 48                                             | rpc160-200 | S.Cerevisiae, RNA Pol III | RPC160 | D511E        | D481E        | D739E        | Active site | - | D | - |
| Dieci et al.(1995), Ref. 48                                             | rpc160-202 | S.Cerevisiae, RNA Pol III | RPC160 | F512S        | F482S        | F740S        | Active site | - | D | - |
| Dieci et al.(1995), Ref. 48                                             | rpc160-201 | S.Cerevisiae, RNA Pol III | RPC160 | F512Y        | F482Y        | F740Y        | Active site | - | D | - |
| Dieci et al.(1995), Ref. 48                                             | rpc160-203 | S.Cerevisiae, RNA Pol III | RPC160 | D513V        | D483V        | D741V        | Active site | - | D | - |
| Dieci et al.(1995), Ref. 48                                             | rpc160-204 | S.Cerevisiae, RNA Pol III | RPC160 | D513E        | D483E        | D741E        | Active site | - | D | - |
| Dieci et al.(1995), Ref. 48                                             | rpc160-182 | S.Cerevisiae, RNA Pol III | RPC160 | G514V        | G484V        | G742V        | Active site | - | D | - |
| Dieci et al.(1995), Ref. 48                                             | rpc160-205 | S.Cerevisiae, RNA Pol III | RPC160 | D515E        | D485E        | D743E        | Active site | - | D | - |
| Dieci et al.(1995), Ref. 48                                             | rpc160-193 | S.Cerevisiae, RNA Pol III | RPC160 | D515G        | D485G        | D743G        | Active site | - | D | - |
| Dieci et al.(1995), Ref. 48                                             | rpc160-210 | S.Cerevisiae, RNA Pol III | RPC160 | E516D        | E486D        | Q744D        | Active site | - | D | - |
| Dieci et al.(1995), Ref. 48                                             | rpc160-219 | S.Cerevisiae, RNA Pol III | RPC160 | E516D, H520D | E486D, H490D | Q744D, H748D | Active site | - | D | - |
| Dieci et al.(1995), Ref. 48                                             | rpc160-206 | S.Cerevisiae, RNA Pol III | RPC160 | M517I        | M487I        | M745I        | Active site | - | D | - |
| Dieci et al.(1995), Ref. 48                                             | rpc160-139 | S.Cerevisiae, RNA Pol III | RPC160 | M517L        | M487L        | M745L        | Active site | - | D | - |
| Dieci et al.(1995), Ref. 48                                             | rpc160-155 | S.Cerevisiae, RNA Pol III | RPC160 | M517V        | M487V        | M745V        | Active site | - | D | - |
| Dieci et al.(1995), Ref. 48                                             | rpc160-211 | S.Cerevisiae, RNA Pol III | RPC160 | M517R        | M487R        | M745R        | Active site | - | D | - |
| Dieci et al.(1995), Ref. 48                                             | rpc160-208 | S.Cerevisiae, RNA Pol III | RPC160 | N518L        | N488L        | A746L        | Active site | - | D | - |
| Dieci et al.(1995), Ref. 48                                             | rpc160-207 | S.Cerevisiae, RNA Pol III | RPC160 | N518R        | N488R        | A746R        | Active site | - | D | - |
| Dieci et al.(1995), Ref. 48                                             | rpc160-105 | S.Cerevisiae, RNA Pol III | RPC160 | H520Q        | H490Q        | H748Q        | Active site | - | D | - |
| Dieci et al.(1995), Ref. 48                                             | rpc160-190 | S.Cerevisiae, RNA Pol III | RPC160 | H520P        | H490P        | H748P        | Active site | - | D | - |
| Dieci et al.(1995), Ref. 48                                             | rpc160-132 | S.Cerevisiae, RNA Pol III | RPC160 | P522R        | P492R        | P750R        | Active site | - | D | - |
| Dieci et al.(1995), Ref. 48                                             | rpc160-109 | S.Cerevisiae, RNA Pol III | RPC160 | T524S        | S494S        | S752S        | Active site | - | D | - |
| Dieci et al.(1995), Ref. 48                                             | rpc160-149 | S.Cerevisiae, RNA Pol III | RPC160 | T524I, A527V | S494I, T497V | S752I, A755V | Active site | - | D | - |
| Dieci et al.(1995), Ref. 48                                             | rpc160-158 | S.Cerevisiae, RNA Pol III | RPC160 | E526Q        | E496Q        | F754Q        | Active site | - | D | - |
| Dieci et al.(1995), Ref. 48                                             | rpc160-111 | S.Cerevisiae, RNA Pol III | RPC160 | E526G        | E496G        | F754G        | Active site | - | D | - |
| Dieci et al.(1995), Ref. 48                                             | rpc160-222 | S.Cerevisiae, RNA Pol III | RPC160 | E526P        | E496P        | F754P        | Active site | - | D | - |
| Dieci et al.(1995), Ref. 48                                             | rpc160-142 | S.Cerevisiae, RNA Pol III | RPC160 | R528L        | R488L        | Q756L        | Active site | - | D | - |
| Dieci et al.(1995), Ref. 48                                             | rpc160-110 | S.Cerevisiae, RNA Pol III | RPC160 | E530D        | E500D        | E758D        | Active site | - | D | - |
| Dieci et al.(1995), Ref. 48                                             | rpc160-159 | S.Cerevisiae, RNA Pol III | RPC160 | E530V        | E500V        | E758V        | Active site | - | D | - |
| Dieci et al.(1995), Ref. 48                                             | rpc160-185 | S.Cerevisiae, RNA Pol III | RPC160 | A531R        | L501R        | A759R        | Active site | - | D | - |
| Dieci et al.(1995), Ref. 48                                             | rpc160-191 | S.Cerevisiae, RNA Pol III | RPC160 | A531D        | L501D        | A759D        | Active site | - | D | - |
| Dieci et al.(1995), Ref. 48                                             | rpc160-136 | S.Cerevisiae, RNA Pol III | RPC160 | I532V        | S502V        | R760V        | Active site | - | - | - |
| Dieci et al.(1995), Ref. 48                                             | rpc160-148 | S.Cerevisiae, RNA Pol III | RPC160 | I532L        | S502L        | R760L        | Active site | - | - | - |
| Dieci et al.(1995), Ref. 48                                             | rpc160-162 | S.Cerevisiae, RNA Pol III | RPC160 | L534F        | L504F        | Q762F        | Active site | - | - | - |
| Dieci et al.(1995), Ref. 48                                             | rpc160-153 | S.Cerevisiae, RNA Pol III | RPC160 | G536R        | A506R        | L764R        | Active site | - | - | - |
| Dieci et al.(1995), Ref. 48;<br>Hermann-Le Denmat et al.(1994), Ref. 66 | rpc160-209 | S.Cerevisiae, RNA Pol III | RPC160 | N518Q        | N488Q        | A746Q        | Active site | - | D | - |
| Donaldson et al.(2000), Ref. 48;<br>Werner et al.(1992), Ref. 183       | rpc160-226 | S.Cerevisiae, RNA Pol III | RPC160 | C67A         | C67A         | C73A         | Clamp core  | - | A | - |
| Donaldson et al.(2000), Ref. 48;<br>Werner et al.(1992), Ref. 183       | rpc160-227 | S.Cerevisiae, RNA Pol III | RPC160 | C70A         | C70A         | C76A         | Clamp core  | - | A | - |
| Donaldson et al.(2000), Ref. 48;<br>Werner et al.(1992), Ref. 183       | rpc160-220 | S.Cerevisiae, RNA Pol III | RPC160 | C77Q         | C77Q         | S83Q         | Clamp core  | - | A | - |
| Donaldson et al.(2000), Ref. 48;<br>Werner et al.(1992), Ref. 183       | rpc160-228 | S.Cerevisiae, RNA Pol III | RPC160 | G79D         | G79D         | Y88D         | Clamp core  | - | A | - |
| Donaldson et al.(2000), Ref. 48;<br>Werner et al.(1992), Ref. 183       | rpc160-215 | S.Cerevisiae, RNA Pol III | RPC160 | H80Y         | H80Y         | R89Y         | Clamp core  | - | A | - |
| Donaldson et al.(2000), Ref. 48;<br>Werner et al.(1992), Ref. 183       | rpc160-115 | S.Cerevisiae, RNA Pol III | RPC160 | H83L         | H83L         | H92L         | Clamp core  | - | A | - |

|                                                                                                                                        |            |                           |        |                                   |                                   |                                        |                        |              |   |                                                                                            |
|----------------------------------------------------------------------------------------------------------------------------------------|------------|---------------------------|--------|-----------------------------------|-----------------------------------|----------------------------------------|------------------------|--------------|---|--------------------------------------------------------------------------------------------|
| Donaldson et al.(2000), Ref. 48;<br>Werner et al.(1992), Ref. 183<br>Donaldson et al.(2000), Ref. 48;<br>Werner et al.(1992), Ref. 183 | rpc160-230 | S.Cerevisiae, RNA Pol III | RPC160 | C107A                             | C107A                             | L127A                                  | Clamp Head             | -            | - | -                                                                                          |
|                                                                                                                                        | rpc160-231 | S.Cerevisiae, RNA Pol III | RPC160 | C110A                             | C110A                             | N130A                                  | Clamp Head             | -            | - | -                                                                                          |
| Herrmann-Le Denmat et al.(1994), Ref. 66                                                                                               | rpc160-112 | S.Cerevisiae, RNA Pol III | RPC160 | T506I, N509Y                      | S476I, N479Y                      | E734I, N737Y                           | Active site            | -            | D | -                                                                                          |
| Thuillier et al.(1996), Ref. 177                                                                                                       | C160-274   | S.Cerevisiae, RNA Pol III | RPC160 | E763A, K765A                      | E715A, N717A                      | -, Q991A                               | Funnel                 | -            | - | -                                                                                          |
| Thuillier et al.(1996), Ref. 177                                                                                                       | C160-275   | S.Cerevisiae, RNA Pol III | RPC160 | E763A, K765A, K772A, R774A        | E715A, N717A, E724A, R726A        | -, Q991A, E998A, T1000A                | Funnel                 | -            | - | -                                                                                          |
| Thuillier et al.(1996), Ref. 177                                                                                                       | C160-280   | S.Cerevisiae, RNA Pol III | RPC160 | E763A, K765A, K772T, R774A        | E715A, N717A, E724T, R726A        | -, Q991A, E998T, T1000A                | Funnel                 | -            | - | -                                                                                          |
| Thuillier et al.(1996), Ref. 177                                                                                                       | C160-281   | S.Cerevisiae, RNA Pol III | RPC160 | E763A, K765A, R774A, E775A        | E715A, N717A, R726A, D727A        | -, Q991A, T1000A, E1001A               | Funnel                 | -            | - | -                                                                                          |
| Thuillier et al.(1996), Ref. 177                                                                                                       | C160-282   | S.Cerevisiae, RNA Pol III | RPC160 | K772A, R774A                      | E724A, R726A                      | E998A, T1000A                          | Funnel                 | -            | - | -                                                                                          |
| Thuillier et al.(1996), Ref. 177                                                                                                       | C160-276   | S.Cerevisiae, RNA Pol III | RPC160 | R774A, E775A                      | R726A, D727A                      | T1000A, E1001A                         | Funnel                 | -            | - | -                                                                                          |
| Thuillier et al.(1996), Ref. 177                                                                                                       | C160-277   | S.Cerevisiae, RNA Pol III | RPC160 | E775A, E776A                      | D727A, K728A                      | E1001A, K1002A                         | Funnel                 | -            | - | -                                                                                          |
| Thuillier et al.(1996), Ref. 177                                                                                                       | C160-278   | S.Cerevisiae, RNA Pol III | RPC160 | E776A, D779A                      | K728A, R731A                      | K1002A, Q1005A                         | Funnel                 | -            | - | -                                                                                          |
| Thuillier et al.(1996), Ref. 177                                                                                                       | C160-279   | S.Cerevisiae, RNA Pol III | RPC160 | E784A, D786A                      | N736A, K738A                      | N1010A, Y1015A                         | Funnel                 | -            | - | -                                                                                          |
| Thuillier et al.(1996), Ref. 177                                                                                                       | C160-251   | S.Cerevisiae, RNA Pol III | RPC160 | R822A                             | R774A                             | -                                      | Funnel                 | -            | F | -                                                                                          |
| Thuillier et al.(1996), Ref. 177                                                                                                       | C160-252   | S.Cerevisiae, RNA Pol III | RPC160 | R822A, D825A                      | R774A, F777A                      | -,                                     | Funnel                 | -            | F | -                                                                                          |
| Thuillier et al.(1996), Ref. 177                                                                                                       | C160-253   | S.Cerevisiae, RNA Pol III | RPC160 | R822A, D825A, K837A, K840A        | R774A, F777A, K789A, Y792A        | -, Q1046A, S1049A                      | Funnel                 | -            | F | -                                                                                          |
| Thuillier et al.(1996), Ref. 177                                                                                                       | C160-270   | S.Cerevisiae, RNA Pol III | RPC160 | D829A, R830A                      | D781A, R782A                      | -,                                     | Funnel                 | -            | F | Promoter clearance, enhanced pausing, higher cleavage, [NTP] dependent, low polymerization |
| Thuillier et al.(1996), Ref. 177                                                                                                       | C160-257   | S.Cerevisiae, RNA Pol III | RPC160 | K837A, K840A                      | K789A, Y792A                      | Q1046A, S1049A                         | Funnel                 | -            | F | -                                                                                          |
| Thuillier et al.(1996), Ref. 177                                                                                                       | C160-258   | S.Cerevisiae, RNA Pol III | RPC160 | K845A, R849A                      | K797A, E801A                      | E1054A, R1058A                         | Funnel                 | -            | F | -                                                                                          |
| Thuillier et al.(1996), Ref. 177                                                                                                       | C160-255   | S.Cerevisiae, RNA Pol III | RPC160 | R869A, E870A                      | R821A, E822A                      | R1078A, K1079A                         | Cleft                  | Bridge Helix | F | -                                                                                          |
| Thuillier et al.(1996), Ref. 177                                                                                                       | C160-271   | S.Cerevisiae, RNA Pol III | RPC160 | D874A, K878A                      | D826A, K830A                      | D1083A, R1087A                         | Cleft                  | Bridge Helix | F | -                                                                                          |
| Thuillier et al.(1996), Ref. 177                                                                                                       | C160-272   | S.Cerevisiae, RNA Pol III | RPC160 | K878A                             | K830A                             | R1087A                                 | Cleft                  | Bridge Helix | F | -                                                                                          |
| Thuillier et al.(1996), Ref. 177                                                                                                       | C160-273   | S.Cerevisiae, RNA Pol III | RPC160 | K878A, E881A                      | K830A, E833A                      | R1087A, D1090A                         | Cleft                  | Bridge Helix | F | -                                                                                          |
| Thuillier et al.(1996), Ref. 177                                                                                                       | C160-262   | S.Cerevisiae, RNA Pol III | RPC160 | R887A, R888A                      | R839A, R840A                      | R1096A, K1097A                         | Cleft                  | Bridge Helix | F | -                                                                                          |
| Thuillier et al.(1996), Ref. 177                                                                                                       | C160-263   | S.Cerevisiae, RNA Pol III | RPC160 | K891A, E894A, D895A               | K843A, E846A, D847A               | D1100A, H1103A, E1104A                 | Cleft                  | Bridge Helix | F | -                                                                                          |
| Thuillier et al.(1996), Ref. 177                                                                                                       | C160-265   | S.Cerevisiae, RNA Pol III | RPC160 | K891A, D901A, R905A               | K843A, D853A, R857A               | D1100A, A1110A, T1114A                 | Cleft                  | Bridge Helix | F | -                                                                                          |
| Thuillier et al.(1996), Ref. 177                                                                                                       | C160-266   | S.Cerevisiae, RNA Pol III | RPC160 | K891A, E894A, D895A, D901A, R905A | K843A, E846A, D847A, D853A, R857A | D1100A, H1103A, E1104A, A1110A, T1114A | Cleft                  | Bridge Helix | F | -                                                                                          |
| Thuillier et al.(1996), Ref. 177                                                                                                       | C160-264   | S.Cerevisiae, RNA Pol III | RPC160 | D901A                             | D853A                             | A1110A                                 | Cleft                  | -            | F | -                                                                                          |
| Thuillier et al.(1996), Ref. 177                                                                                                       | C160-269   | S.Cerevisiae, RNA Pol III | RPC160 | D901A, R905A                      | D853A, R857A                      | A1110A, T1114A                         | Cleft                  | -            | F | -                                                                                          |
| Thuillier et al.(1996), Ref. 177                                                                                                       | C160-267   | S.Cerevisiae, RNA Pol III | RPC160 | D919A, D922A                      | D871A, D874A                      | -,                                     | Cleft, Foot            | -            | F | -                                                                                          |
| Thuillier et al.(1996), Ref. 177                                                                                                       | C160-268   | S.Cerevisiae, RNA Pol III | RPC160 | E925A, E927A                      | H877A, E879A                      | -,                                     | Foot                   | -            | - | -                                                                                          |
| Thuillier et al.(1996), Ref. 177                                                                                                       | C160-CBC1  | S.Cerevisiae, RNA Pol III | RPC160 | Res 713-926 of Rpb1               | -                                 | -                                      | -                      | -            | - | -                                                                                          |
| Thuillier et al.(1996), Ref. 177                                                                                                       | C160-CBC2  | S.Cerevisiae, RNA Pol III | RPC160 | Res 810-926 of Rpb1               | -                                 | -                                      | -                      | -            | - | -                                                                                          |
| Thuillier et al.(1996), Ref. 177                                                                                                       | C160-CBC3  | S.Cerevisiae, RNA Pol III | RPC160 | Res 810-843 of Rpb1               | -                                 | -                                      | -                      | -            | - | -                                                                                          |
| Thuillier et al.(1996), Ref. 177                                                                                                       | C160-CBC4  | S.Cerevisiae, RNA Pol III | RPC160 | Res 866-927 of yRpb1              | -                                 | -                                      | -                      | -            | - | -                                                                                          |
| Werner et al.(1992), Ref. 192                                                                                                          | rpc160-168 | S.Cerevisiae, RNA Pol III | RPC160 | C67H, C70H                        | C67H, C70H                        | C73H, C76H                             | Clamp core             | -            | A | -                                                                                          |
| Werner et al.(1992), Ref. 192                                                                                                          | rpc160-169 | S.Cerevisiae, RNA Pol III | RPC160 | C67H, C70Q                        | C67H, C70Q                        | C73H, C76Q                             | Clamp core             | -            | A | -                                                                                          |
| Werner et al.(1992), Ref. 192                                                                                                          | rpc160-180 | S.Cerevisiae, RNA Pol III | RPC160 | C67Q, C70H                        | C67Q, C70H                        | C73Q, C76H                             | Clamp core             | -            | A | -                                                                                          |
| Werner et al.(1992), Ref. 192                                                                                                          | rpc160-188 | S.Cerevisiae, RNA Pol III | RPC160 | C67Q, C70Q                        | C67Q, C70Q                        | C73Q, C76Q                             | Clamp core             | -            | A | -                                                                                          |
| Werner et al.(1992), Ref. 192                                                                                                          | rpc160-232 | S.Cerevisiae, RNA Pol III | RPC160 | C67Q, C77A, H80R                  | C67Q, C77A, H80R                  | C73Q, S83A, R89R                       | Clamp core             | -            | A | -                                                                                          |
| Werner et al.(1992), Ref. 192                                                                                                          | rpc160-124 | S.Cerevisiae, RNA Pol III | RPC160 | Δ75-78, I102R                     | Δ75-78, V102R                     | Δ81-87, E122R                          | Clamp core, clamp head | -            | A | -                                                                                          |
| Werner et al.(1992), Ref. 192                                                                                                          | rpc160-213 | S.Cerevisiae, RNA Pol III | RPC160 | C77H                              | C77H                              | S83H                                   | Clamp core             | -            | A | -                                                                                          |
| Werner et al.(1992), Ref. 192                                                                                                          | rpc160-235 | S.Cerevisiae, RNA Pol III | RPC160 | C77A, H78R, H80R, H83R            | C77A, P78R, H80R, H83R            | S83A, R87R, R89R, H92R                 | Clamp core             | -            | A | -                                                                                          |
| Werner et al.(1992), Ref. 192                                                                                                          | rpc160-234 | S.Cerevisiae, RNA Pol III | RPC160 | C77A, H80R                        | C77A, H80R                        | S83A, R89R                             | Clamp core             | -            | A | -                                                                                          |

|                                |            |                           |        |                          |                          |                          |                        |              |   |                       |
|--------------------------------|------------|---------------------------|--------|--------------------------|--------------------------|--------------------------|------------------------|--------------|---|-----------------------|
| Werner et al.(1992), Ref. 192  | rpc160-233 | S.Cerevisiae, RNA Pol III | RPC160 | C77A, H80R, C107Q, C110Q | C77A, H80R, C107Q, C110Q | S83A, R89R, L127Q, N130Q | Clamp core, clamp head | -            | A | -                     |
| Werner et al.(1992), Ref. 192  | rpc160-126 | S.Cerevisiae, RNA Pol III | RPC160 | H78Q                     | P78Q                     | R87Q                     | Clamp core             | -            | A | -                     |
| Werner et al.(1992), Ref. 192  | rpc160-214 | S.Cerevisiae, RNA Pol III | RPC160 | H78Q, H83L               | P78Q, H83L               | R87Q, H92L               | Clamp core             | -            | A | -                     |
| Werner et al.(1992), Ref. 192  | rpc160-103 | S.Cerevisiae, RNA Pol III | RPC160 | H80Q, K85I               | H80Q, D85I               | R89Q, E94I               | Clamp core             | -            | A | -                     |
| Werner et al.(1992), Ref. 192  | rpc160-179 | S.Cerevisiae, RNA Pol III | RPC160 | H80Q                     | H80Q                     | R89Q                     | Clamp core             | -            | A | -                     |
| Werner et al.(1992), Ref. 192  | rpc160-189 | S.Cerevisiae, RNA Pol III | RPC160 | H80L                     | H80L                     | R89L                     | Clamp core             | -            | A | -                     |
| Werner et al.(1992), Ref. 192  | rpc160-223 | S.Cerevisiae, RNA Pol III | RPC160 | H80C                     | H80C                     | R89C                     | Clamp core             | -            | A | -                     |
| Werner et al.(1992), Ref. 192  | rpc160-229 | S.Cerevisiae, RNA Pol III | RPC160 | G82D                     | G82D                     | G91D                     | Clamp core             | -            | A | -                     |
| Werner et al.(1992), Ref. 192  | rpc160-106 | S.Cerevisiae, RNA Pol III | RPC160 | F96L                     | I96L                     | V105L                    | Clamp Head             | -            | A | -                     |
| Werner et al.(1992), Ref. 192  | rpc160-177 | S.Cerevisiae, RNA Pol III | RPC160 | C107H, C110H             | C107H, C110H             | L127H, N130H             | Clamp Head             | -            | - | -                     |
| Werner et al.(1992), Ref. 192  | rpc160-176 | S.Cerevisiae, RNA Pol III | RPC160 | C107H, C110Q             | C107H, C110Q             | L127H, N130Q             | Clamp Head             | -            | - | -                     |
| Werner et al.(1992), Ref. 192  | rpc160-178 | S.Cerevisiae, RNA Pol III | RPC160 | C107Q, C110H             | C107Q, C110H             | L127Q, N130H             | Clamp Head             | -            | - | -                     |
| Werner et al.(1992), Ref. 192  | rpc160-114 | S.Cerevisiae, RNA Pol III | RPC160 | K108R                    | M108R                    | Y128R                    | Clamp Head             | -            | - | -                     |
| Shaaban et al.(1995), Ref. 157 | -          | S.Cerevisiae, RNA Pol III | Ret1   | Q300P                    | T329P                    | K252P                    | Lobe                   | -            | C | Increased termination |
| Shaaban et al.(1995), Ref. 157 | -          | S.Cerevisiae, RNA Pol III | Ret1   | Y304H, G306R             | F333H, G335R             | Y256H, F258R             | Lobe                   | -            | C | Reduced termination   |
| Shaaban et al.(1995), Ref. 157 | -          | S.Cerevisiae, RNA Pol III | Ret1   | G306S                    | G335S                    | F258S                    | Lobe                   | -            | C | Increased termination |
| Shaaban et al.(1995), Ref. 157 | -          | S.Cerevisiae, RNA Pol III | Ret1   | V309L                    | G338L                    | L261L                    | Lobe                   | -            | C | Reduced termination   |
| Shaaban et al.(1995), Ref. 157 | -          | S.Cerevisiae, RNA Pol III | Ret1   | T311A                    | A340A                    | D263A                    | Lobe                   | -            | C | Reduced termination   |
| Shaaban et al.(1995), Ref. 157 | -          | S.Cerevisiae, RNA Pol III | Ret1   | T311A, T318A             | A340A, K347A             | D263A, G273A             | Lobe                   | -            | C | Reduced termination   |
| Shaaban et al.(1995), Ref. 157 | -          | S.Cerevisiae, RNA Pol III | Ret1   | R313K                    | G342K                    | K265K                    | Lobe                   | -            | C | Reduced termination   |
| Shaaban et al.(1995), Ref. 157 | -          | S.Cerevisiae, RNA Pol III | Ret1   | R313I                    | G342I                    | K265I                    | Lobe                   | -            | C | Reduced termination   |
| Shaaban et al.(1995), Ref. 157 | -          | S.Cerevisiae, RNA Pol III | Ret1   | R313S                    | G342S                    | K265S                    | Lobe                   | -            | C | Reduced termination   |
| Shaaban et al.(1995), Ref. 157 | -          | S.Cerevisiae, RNA Pol III | Ret1   | L317Q                    | E346Q                    | L289Q                    | Lobe                   | -            | C | Reduced termination   |
| Shaaban et al.(1995), Ref. 157 | -          | S.Cerevisiae, RNA Pol III | Ret1   | L317P, E325K             | E346P, D354K             | L289P, K280K             | Lobe                   | -            | C | Reduced termination   |
| Shaaban et al.(1995), Ref. 157 | -          | S.Cerevisiae, RNA Pol III | Ret1   | I319N                    | R348N                    | R274N                    | Lobe                   | -            | C | Reduced termination   |
| Shaaban et al.(1995), Ref. 157 | -          | S.Cerevisiae, RNA Pol III | Ret1   | I1071M                   | I1139M                   | E1041M                   | Anchor                 | -            | I | Increased termination |
| Shaaban et al.(1995), Ref. 157 | -          | S.Cerevisiae, RNA Pol III | Ret1   | I1071F                   | I1139F                   | E1041F                   | Anchor                 | -            | I | Increased termination |
| Shaaban et al.(1995), Ref. 157 | -          | S.Cerevisiae, RNA Pol III | Ret1   | A1072T                   | A1140T                   | A1042T                   | Anchor                 | -            | I | Increased termination |
| Shaaban et al.(1995), Ref. 157 | -          | S.Cerevisiae, RNA Pol III | Ret1   | A1072V                   | A1140V                   | A1042V                   | Anchor                 | -            | I | Increased termination |
| Shaaban et al.(1995), Ref. 157 | -          | S.Cerevisiae, RNA Pol III | Ret1   | Y1073H                   | H1141H                   | Y1043H                   | Anchor                 | -            | I | Increased termination |
| Shaaban et al.(1995), Ref. 157 | -          | S.Cerevisiae, RNA Pol III | Ret1   | Y1073H, L1078F           | H1141H, F1146F           | Y1043H, T1048F           | Anchor                 | -            | I | Increased termination |
| Shaaban et al.(1995), Ref. 157 | -          | S.Cerevisiae, RNA Pol III | Ret1   | A1075V, L1080F           | A1143V, K1148F           | A1045V, Q1050F           | Anchor                 | -            | I | Increased termination |
| Shaaban et al.(1995), Ref. 157 | -          | S.Cerevisiae, RNA Pol III | Ret1   | S1076P                   | A1144P                   | A1046P                   | Anchor                 | -            | I | Increased termination |
| Shaaban et al.(1995), Ref. 157 | -          | S.Cerevisiae, RNA Pol III | Ret1   | S1076T                   | A1144T                   | A1046T                   | Anchor                 | -            | I | Increased termination |
| Shaaban et al.(1995), Ref. 157 | -          | S.Cerevisiae, RNA Pol III | Ret1   | T455S, G485D             | S480S, K510D             | S392S, D426D             | Fork                   | Fork1, Fork2 | - | Reduced termination   |
| Shaaban et al.(1995), Ref. 157 | -          | S.Cerevisiae, RNA Pol III | Ret1   | H456D, L467M             | Q481D, L492M             | Q393D, L404M             | Fork                   | -            | - | Increased termination |
| Shaaban et al.(1995), Ref. 157 | -          | S.Cerevisiae, RNA Pol III | Ret1   | H456Y, K479T             | Q481Y, R504T             | Q393Y, R420T             | Fork                   | Fork2        | - | Reduced termination   |
| Shaaban et al.(1995), Ref. 157 | -          | S.Cerevisiae, RNA Pol III | Ret1   | V457F, V483D             | V482F, L508D             | F394F, G424D             | Fork                   | -, Fork2     | - | Reduced termination   |
| Shaaban et al.(1995), Ref. 157 | -          | S.Cerevisiae, RNA Pol III | Ret1   | L461I                    | Y486I                    | T398I                    | Fork                   | -            | - | Increased termination |
| Shaaban et al.(1995), Ref. 157 | -          | S.Cerevisiae, RNA Pol III | Ret1   | I464T                    | S489T                    | L401T                    | Fork                   | -            | - | Increased termination |
| Shaaban et al.(1995), Ref. 157 | -          | S.Cerevisiae, RNA Pol III | Ret1   | L467W, K482N, P486A      | L492W, K507N, P511A      | L404W, A423N, V427A      | Fork                   | -            | - | Increased termination |
| Shaaban et al.(1995), Ref. 157 | -          | S.Cerevisiae, RNA Pol III | Ret1   | L467W, E478V             | L492W, G503V             | L404W, T419V             | Fork                   | -            | - | Increased termination |
| Shaaban et al.(1995), Ref. 157 | -          | S.Cerevisiae, RNA Pol III | Ret1   | M469L, F477L, E478A      | H494L, I502L, G503A      | H406L, L418L, T419A      | Fork                   | -            | - | Reduced termination   |

|                                |   |                           |      |                            |                            |                            |      |       |   |                       |
|--------------------------------|---|---------------------------|------|----------------------------|----------------------------|----------------------------|------|-------|---|-----------------------|
| Shaaban et al.(1995), Ref. 157 | - | S.Cerevisiae, RNA Pol III | Ret1 | M470L                      | L495L                      | K407L                      | Fork | Fork2 | - | Increased termination |
| Shaaban et al.(1995), Ref. 157 | - | S.Cerevisiae, RNA Pol III | Ret1 | M470T, R481K               | L495T, G506K               | K407T, R422K               | Fork | Fork2 | - | Increased termination |
| Shaaban et al.(1995), Ref. 157 | - | S.Cerevisiae, RNA Pol III | Ret1 | M470L, E478D               | L495L, G503D               | K407L, T419D               | Fork | Fork2 | - | Reduced termination   |
| Shaaban et al.(1995), Ref. 157 | - | S.Cerevisiae, RNA Pol III | Ret1 | T471S                      | R496S                      | R408S                      | Fork | Fork2 | - | Increased termination |
| Shaaban et al.(1995), Ref. 157 | - | S.Cerevisiae, RNA Pol III | Ret1 | T471K, S475P               | R496K, T500P               | R408K, G416P               | Fork | Fork2 | - | Increased termination |
| Shaaban et al.(1995), Ref. 157 | - | S.Cerevisiae, RNA Pol III | Ret1 | T471R                      | R496R                      | R408R                      | Fork | Fork2 | - | Reduced termination   |
| Shaaban et al.(1995), Ref. 157 | - | S.Cerevisiae, RNA Pol III | Ret1 | R472K                      | R497K                      | R409K                      | Fork | Fork2 | - | Reduced termination   |
| Shaaban et al.(1995), Ref. 157 | - | S.Cerevisiae, RNA Pol III | Ret1 | R472K, S480P               | R497K, D505P               | R409K, E421P               | Fork | Fork2 | - | Reduced termination   |
| Shaaban et al.(1995), Ref. 157 | - | S.Cerevisiae, RNA Pol III | Ret1 | I473L, E478Q               | T498L, G503Q               | I410L, T419Q               | Fork | Fork2 | - | Increased termination |
| Shaaban et al.(1995), Ref. 157 | - | S.Cerevisiae, RNA Pol III | Ret1 | S474F                      | N499F                      | S411F                      | Fork | Fork2 | - | Reduced termination   |
| Shaaban et al.(1995), Ref. 157 | - | S.Cerevisiae, RNA Pol III | Ret1 | S474C, V483D               | N499C, L508D               | S411C, G424D               | Fork | Fork2 | - | Reduced termination   |
| Shaaban et al.(1995), Ref. 157 | - | S.Cerevisiae, RNA Pol III | Ret1 | Q476L                      | P501L                      | G417L                      | Fork | Fork2 | - | Reduced termination   |
| Shaaban et al.(1995), Ref. 157 | - | S.Cerevisiae, RNA Pol III | Ret1 | Q476L, P486R               | P501L, P511R               | G417L, V427R               | Fork | Fork2 | - | Reduced termination   |
| Shaaban et al.(1995), Ref. 157 | - | S.Cerevisiae, RNA Pol III | Ret1 | Q476R, P486L               | P501R, P511L               | G417R, V427L               | Fork | Fork2 | - | Reduced termination   |
| Shaaban et al.(1995), Ref. 157 | - | S.Cerevisiae, RNA Pol III | Ret1 | Q476R, R481I, P486S        | P501R, G506I, P511S        | G417R, R422I, V427S        | Fork | Fork2 | - | Reduced termination   |
| Shaaban et al.(1995), Ref. 157 | - | S.Cerevisiae, RNA Pol III | Ret1 | F477C, K479N, K482Q, V483F | I502C, R504N, K507Q, L508F | L418C, R420N, A423Q, G424F | Fork | Fork2 | - | Reduced termination   |
| Shaaban et al.(1995), Ref. 157 | - | S.Cerevisiae, RNA Pol III | Ret1 | E478D                      | G503D                      | T419D                      | Fork | Fork2 | - | Reduced termination   |
| Shaaban et al.(1995), Ref. 157 | - | S.Cerevisiae, RNA Pol III | Ret1 | R481K                      | G506K                      | R422K                      | Fork | Fork2 | - | Increased termination |
| Shaaban et al.(1995), Ref. 157 | - | S.Cerevisiae, RNA Pol III | Ret1 | G485D                      | K510D                      | D426D                      | Fork | Fork2 | - | Reduced termination   |
| Shaaban et al.(1995), Ref. 157 | - | S.Cerevisiae, RNA Pol III | Ret1 | G485C                      | K510C                      | D426C                      | Fork | Fork2 | - | Reduced termination   |
| Shaaban et al.(1995), Ref. 157 | - | S.Cerevisiae, RNA Pol III | Ret1 | L489E                      | L514E                      | V430E                      | Fork | Fork2 | D | Increased termination |
| Shaaban et al.(1995), Ref. 157 | - | S.Cerevisiae, RNA Pol III | Ret1 | Q490L                      | H515L                      | H431L                      | Fork | Fork2 | D | Reduced termination   |
| Shaaban et al.(1995), Ref. 157 | - | S.Cerevisiae, RNA Pol III | Ret1 | Q490P, A515G               | H515P, S540G               | H431P, A456G               | Fork | Fork2 | D | Reduced termination   |
| Shaaban et al.(1995), Ref. 157 | - | S.Cerevisiae, RNA Pol III | Ret1 | Q490K, E506V               | H515K, Q531V               | H431K, A447V               | Fork | Fork2 | D | Reduced termination   |
| Shaaban et al.(1995), Ref. 157 | - | S.Cerevisiae, RNA Pol III | Ret1 | S492Y                      | T517Y                      | T433Y                      | Fork | -     | D | Reduced termination   |
| Shaaban et al.(1995), Ref. 157 | - | S.Cerevisiae, RNA Pol III | Ret1 | S492T, L497H               | T517T, V522H               | T433T, I438H               | Fork | -     | D | Reduced termination   |
| Shaaban et al.(1995), Ref. 157 | - | S.Cerevisiae, RNA Pol III | Ret1 | Q493H                      | H518H                      | H434H                      | Fork | -     | D | Increased termination |
| Shaaban et al.(1995), Ref. 157 | - | S.Cerevisiae, RNA Pol III | Ret1 | Q493H, L516F               | H518H, L541F               | H434H, A457F               | Fork | -     | D | Increased termination |
| Shaaban et al.(1995), Ref. 157 | - | S.Cerevisiae, RNA Pol III | Ret1 | F494I, L516F               | W519L, L541F               | Y435I, A457F               | Fork | -     | D | Increased termination |
| Shaaban et al.(1995), Ref. 157 | - | S.Cerevisiae, RNA Pol III | Ret1 | G495V                      | G520V                      | G436V                      | Fork | -     | D | Increased termination |
| Shaaban et al.(1995), Ref. 157 | - | S.Cerevisiae, RNA Pol III | Ret1 | T499A                      | P524A                      | P440A                      | Fork | -     | D | Increased termination |
| Shaaban et al.(1995), Ref. 157 | - | S.Cerevisiae, RNA Pol III | Ret1 | A500P                      | A525P                      | V441P                      | Fork | -     | D | Increased termination |
| Shaaban et al.(1995), Ref. 157 | - | S.Cerevisiae, RNA Pol III | Ret1 | D501E                      | E526E                      | E442E                      | Fork | -     | D | Reduced termination   |
| Shaaban et al.(1995), Ref. 157 | - | S.Cerevisiae, RNA Pol III | Ret1 | G505S                      | G530S                      | G446S                      | Fork | -     | D | Increased termination |
| Shaaban et al.(1995), Ref. 157 | - | S.Cerevisiae, RNA Pol III | Ret1 | E506A                      | Q531A                      | A447A                      | Fork | -     | D | Reduced termination   |
| Shaaban et al.(1995), Ref. 157 | - | S.Cerevisiae, RNA Pol III | Ret1 | E506A, T518S               | Q531A, S543S               | A447A, A459S               | Fork | -     | D | Reduced termination   |
| Shaaban et al.(1995), Ref. 157 | - | S.Cerevisiae, RNA Pol III | Ret1 | K512T                      | K537T                      | T453T                      | Fork | -     | D | Reduced termination   |
| Shaaban et al.(1995), Ref. 157 | - | S.Cerevisiae, RNA Pol III | Ret1 | N513T                      | N538T                      | S454T                      | Fork | -     | D | Increased termination |
| Shaaban et al.(1995), Ref. 157 | - | S.Cerevisiae, RNA Pol III | Ret1 | L516F                      | L541F                      | A457F                      | Fork | -     | D | Increased termination |
| Shaaban et al.(1995), Ref. 157 | - | S.Cerevisiae, RNA Pol III | Ret1 | M517L, T518A               | M542L, S543A               | Y458L, A459A               | Fork | -     | D | Reduced termination   |
| Shaaban et al.(1995), Ref. 157 | - | S.Cerevisiae, RNA Pol III | Ret1 | M517T, H519Q               | M542T, C544Q               | Y458T, R460Q               | Fork | -     | D | Reduced termination   |
| Shaaban et al.(1995), Ref. 157 | - | S.Cerevisiae, RNA Pol III | Ret1 | T518S                      | S543S                      | A459S                      | Fork | -     | - | Reduced termination   |
| Shaaban et al.(1995), Ref. 157 | - | S.Cerevisiae, RNA Pol III | Ret1 | T518A                      | S543A                      | A459A                      | Fork | -     | - | Reduced termination   |



|                                                           |           |                           |      |                     |                     |                     |                  |         |   |                       |
|-----------------------------------------------------------|-----------|---------------------------|------|---------------------|---------------------|---------------------|------------------|---------|---|-----------------------|
| Shaaban et al.(1995), Ref. 157                            | -         | S.Cerevisiae, RNA Pol III | Ret1 | T518N               | SS43N               | A459N               | Fork             | -       | - | Reduced termination   |
| Shaaban et al.(1995), Ref. 157                            | -         | S.Cerevisiae, RNA Pol III | Ret1 | T521P               | S546P               | D462P               | Fork             | -       | - | Increased termination |
| Shaaban et al.(1995), Ref. 157                            | -         | S.Cerevisiae, RNA Pol III | Ret1 | T521A               | S546A               | D462A               | Fork             | -       | - | Reduced termination   |
| Shaaban et al.(1995), Ref. 157                            | -         | S.Cerevisiae, RNA Pol III | Ret1 | R1061G              | R1129G              | R1031G              | Anchor           | Switch3 | I | Increased termination |
| Shaaban et al.(1995), Ref. 157                            | -         | S.Cerevisiae, RNA Pol III | Ret1 | R1061T, I1071L      | R1129T, I1139L      | R1031T, E1041L      | Anchor           | Switch3 | I | Increased termination |
| Shaaban et al.(1995), Ref. 157                            | -         | S.Cerevisiae, RNA Pol III | Ret1 | I1071F, L1080F      | I1139F, K1148F      | E1041F, Q1050F      | Anchor           | Switch4 | I | Increased termination |
| Shaaban et al.(1995), Ref. 157                            | -         | S.Cerevisiae, RNA Pol III | Ret1 | I1071N, Q1077H      | I1139N, S1145H      | E1041N, H1047H      | Anchor           | Switch4 | I | Increased termination |
| Shaaban et al.(1995), Ref. 157                            | -         | S.Cerevisiae, RNA Pol III | Ret1 | I1071F, S1076A      | I1139F, A1144A      | E1041F, A1046A      | Anchor           | Switch4 | I | Increased termination |
| Shaaban et al.(1995), Ref. 157                            | -         | S.Cerevisiae, RNA Pol III | Ret1 | L1080F              | K1148F              | Q1050F              | Anchor           | Switch4 | I | Increased termination |
| Shaaban et al.(1995), Ref. 157                            | -         | S.Cerevisiae, RNA Pol III | Ret1 | L1080F, E1081D      | K1148F, E1149D      | Q1050F, E1051D      | Anchor           | Switch4 | I | Increased termination |
| Shaaban et al.(1995), Ref. 157                            | -         | S.Cerevisiae, RNA Pol III | Ret1 | R1082G              | R1150G              | M1052G              | Anchor           | Switch4 | I | Increased termination |
| Shaaban et al.(1995), Ref. 157                            | -         | S.Cerevisiae, RNA Pol III | Ret1 | L497V, H519P, D524A | V522V, C544P, T549A | I438V, R460P, F466A | Fork, External2  | -       | D | Reduced termination   |
| Shaaban et al.(1995), Ref. 157                            | -         | S.Cerevisiae, RNA Pol III | Ret1 | M517V, D524A        | M542V, T549A        | Y458V, F466A        | Fork, Protrusion | -       | D | Increased termination |
| Sugaya (2003), Ref. 167                                   | tsAF8     | S.Pombe, RNA Pol II       | Rpb1 | A307D               | A301D               | D579D               | Clamp core       | Rudder  | - | -                     |
| Sugaya (2003), Ref. 167                                   | -         | S.Pombe, RNA Pol II       | Rpb1 | A307D, P986S        | A301D, I983S        | D579D, L1168S       | Clamp core, Foot | Rudder  | - | -                     |
| Sugaya (2003), Ref. 167;<br>Sugaya et al.(1998), Ref. 168 | -         | S.Pombe, RNA Pol II       | Rpb1 | P986S               | I983S               | L1168S              | Foot             | -       | - | -                     |
| Kawagishi-Kobayashi et al.(1996), Ref. 84                 | -         | S.Pombe, RNA Pol II       | Rpb2 | Q311K               | Q325K               | P248K               | Lobe             | -       | C | -                     |
| Kawagishi-Kobayashi et al.(1996), Ref. 84                 | -         | S.Pombe, RNA Pol II       | Rpb2 | Q343N               | Q357N               | S286N               | Lobe             | -       | C | -                     |
| Kawagishi-Kobayashi et al.(1996), Ref. 84                 | -         | S.Pombe, RNA Pol II       | Rpb2 | E354K               | E368K               | D295K               | Lobe             | -       | C | -                     |
| Kawagishi-Kobayashi et al.(1996), Ref. 84                 | -         | S.Pombe, RNA Pol II       | Rpb2 | E357A               | E371A               | F298A               | Lobe             | -       | C | -                     |
| Kawagishi-Kobayashi et al.(1996), Ref. 84                 | -         | S.Pombe, RNA Pol II       | Rpb2 | D383A               | D397A               | D324A               | Lobe             | -       | C | -                     |
| Kawagishi-Kobayashi et al.(1996), Ref. 84                 | rpb2H386L | S.Pombe, RNA Pol II       | Rpb2 | H386L               | H400L               | H327L               | Lobe             | -       | C | -                     |
| Kawagishi-Kobayashi et al.(1996), Ref. 84                 | -         | S.Pombe, RNA Pol II       | Rpb2 | K390A               | K404A               | R331A               | Lobe             | -       | C | -                     |

<sup>a</sup> Blanks are used when the allele's name is the same as the mutation

<sup>b</sup> Blanks are used when no affected function can be attributed to the mutant's phenotype
